# Supplementary material
Source: publisher figshare collection journal article supplement (https://future-science-group.figshare.com/articles/dataset/_/23044967)
Supplement: Supplementary file 1 [file 1]

## Sheet: Sheet1
Table S3: ATAC Accessibility in Select Genes
		EM102	EM104	EM106	EM107	EM109	EM113
CDKs	CDK1	Tumor More Accessible	Tumor More Accessible	Tumor More Accessible	Tumor More Accessible	Tumor More Accessible	Normal More Accessible
	CDK2	Tumor More Accessible	Tumor More Accessible	Tumor More Accessible	Tumor More Accessible	Tumor More Accessible	Normal More Accessible
	CDK2AP1	Tumor More Accessible	Tumor More Accessible	Tumor More Accessible	Normal More Accessible	Tumor More Accessible	Normal More Accessible
	CDK2AP2	Tumor More Accessible	Tumor More Accessible	No Accessibility Difference	No Accessibility Difference	Tumor More Accessible	Normal More Accessible
	CDK3	Tumor More Accessible	Normal More Accessible	Tumor More Accessible	Tumor More Accessible	Tumor More Accessible	Normal More Accessible
	CDK4	Tumor More Accessible	Tumor More Accessible	Tumor More Accessible	No Accessibility Difference	Tumor More Accessible	Normal More Accessible
	CDK5	Tumor More Accessible	Tumor More Accessible	Tumor More Accessible	Tumor More Accessible	Tumor More Accessible	Normal More Accessible
	CDK5R1	Tumor More Accessible	Tumor More Accessible	Tumor More Accessible	Normal More Accessible	Tumor More Accessible	Normal More Accessible
	CDK5R2	Tumor More Accessible	Tumor More Accessible	Tumor More Accessible	Tumor More Accessible	Tumor More Accessible	Tumor More Accessible
	CDK5RAP1	Tumor More Accessible	Tumor More Accessible	Tumor More Accessible	Tumor More Accessible	Tumor More Accessible	No Accessibility Difference
	CDK5RAP2	Tumor More Accessible	Tumor More Accessible	Tumor More Accessible	Tumor More Accessible	Tumor More Accessible	Normal More Accessible
	CDK5RAP3	Tumor More Accessible	Tumor More Accessible	Tumor More Accessible	Normal More Accessible	Tumor More Accessible	Normal More Accessible
	CDK6	Tumor More Accessible	Tumor More Accessible	Tumor More Accessible	No Accessibility Difference	Tumor More Accessible	Normal More Accessible
	CDK6-AS1	Tumor More Accessible	Tumor More Accessible	Tumor More Accessible	No Accessibility Difference	Tumor More Accessible	Normal More Accessible
	CDK7	Tumor More Accessible	Tumor More Accessible	Tumor More Accessible	Tumor More Accessible	Tumor More Accessible	Normal More Accessible
	CDK8	Tumor More Accessible	Tumor More Accessible	Tumor More Accessible	No Accessibility Difference	Tumor More Accessible	Normal More Accessible
	CDK9	Tumor More Accessible	Tumor More Accessible	Tumor More Accessible	No Accessibility Difference	Tumor More Accessible	Normal More Accessible
	CDK10	Tumor More Accessible	Tumor More Accessible	Tumor More Accessible	Normal More Accessible	Tumor More Accessible	Normal More Accessible
	CDK11A	Tumor More Accessible	Tumor More Accessible	Tumor More Accessible	No Accessibility Difference	Tumor More Accessible	Normal More Accessible
	CDK11B	Tumor More Accessible	Tumor More Accessible	Tumor More Accessible	No Accessibility Difference	Tumor More Accessible	Normal More Accessible
	CDK12	Tumor More Accessible	Tumor More Accessible	Tumor More Accessible	Normal More Accessible	Tumor More Accessible	Normal More Accessible
	CDK13	Tumor More Accessible	Tumor More Accessible	Tumor More Accessible	No Accessibility Difference	Tumor More Accessible	Normal More Accessible
	CDK14	Tumor More Accessible	Tumor More Accessible	Tumor More Accessible	Normal More Accessible	Tumor More Accessible	Normal More Accessible
	CDK15	Tumor More Accessible	Tumor More Accessible	Tumor More Accessible	Tumor More Accessible	Tumor More Accessible	Normal More Accessible
	CDK16	Tumor More Accessible	Tumor More Accessible	Tumor More Accessible	Tumor More Accessible	Tumor More Accessible	Normal More Accessible
	CDK17	Tumor More Accessible	Tumor More Accessible	Tumor More Accessible	No Accessibility Difference	Tumor More Accessible	Normal More Accessible
	CDK18	Tumor More Accessible	Tumor More Accessible	Tumor More Accessible	Tumor More Accessible	Tumor More Accessible	Normal More Accessible
	CDK19	Tumor More Accessible	Tumor More Accessible	Tumor More Accessible	No Accessibility Difference	Tumor More Accessible	Normal More Accessible
	CDK20	Tumor More Accessible	Tumor More Accessible	Tumor More Accessible	No Accessibility Difference	Tumor More Accessible	Normal More Accessible
	CDKAL1	Tumor More Accessible	Tumor More Accessible	No Accessibility Difference	Tumor More Accessible	Tumor More Accessible	No Accessibility Difference
	CDKL1	Tumor More Accessible	Tumor More Accessible	Tumor More Accessible	Tumor More Accessible	Tumor More Accessible	Normal More Accessible
	CDKL2	Tumor More Accessible	Tumor More Accessible	Tumor More Accessible	No Accessibility Difference	Tumor More Accessible	Tumor More Accessible
	CDKL3	Tumor More Accessible	Tumor More Accessible	Tumor More Accessible	Tumor More Accessible	Tumor More Accessible	Normal More Accessible
	CDKL4	Tumor More Accessible	Tumor More Accessible	Tumor More Accessible	No Accessibility Difference	Tumor More Accessible	No Accessibility Difference
	CDKL5	Tumor More Accessible	Tumor More Accessible	Tumor More Accessible	Tumor More Accessible	Tumor More Accessible	Normal More Accessible
	CDKN1A	Tumor More Accessible	Tumor More Accessible	Tumor More Accessible	No Accessibility Difference	Tumor More Accessible	Normal More Accessible
	CDKN1B	Tumor More Accessible	Tumor More Accessible	Tumor More Accessible	No Accessibility Difference	Tumor More Accessible	Normal More Accessible
	CDKN1C	Tumor More Accessible	Tumor More Accessible	No Accessibility Difference	No Accessibility Difference	Tumor More Accessible	Normal More Accessible
	CDKN2A	Tumor More Accessible	Tumor More Accessible	Tumor More Accessible	Tumor More Accessible	Tumor More Accessible	Normal More Accessible
	CDKN2A-DT	Tumor More Accessible	Tumor More Accessible	Tumor More Accessible	Tumor More Accessible	Tumor More Accessible	Normal More Accessible
	CDKN2AIP	Tumor More Accessible	Tumor More Accessible	Tumor More Accessible	No Accessibility Difference	Tumor More Accessible	Normal More Accessible
	CDKN2AIPNL	Tumor More Accessible	Tumor More Accessible	Tumor More Accessible	No Accessibility Difference	Tumor More Accessible	Normal More Accessible
	CDKN2B	Tumor More Accessible	Tumor More Accessible	Tumor More Accessible	Tumor More Accessible	Tumor More Accessible	Normal More Accessible
	CDKN2B-AS1	Tumor More Accessible	Tumor More Accessible	Tumor More Accessible	Tumor More Accessible	Tumor More Accessible	Normal More Accessible
	CDKN2C	Tumor More Accessible	Tumor More Accessible	Tumor More Accessible	Tumor More Accessible	Tumor More Accessible	Normal More Accessible
	CDKN2D	Tumor More Accessible	Tumor More Accessible	Tumor More Accessible	Normal More Accessible	Tumor More Accessible	Normal More Accessible
	CDKN3	Tumor More Accessible	Tumor More Accessible	Tumor More Accessible	No Accessibility Difference	Tumor More Accessible	Normal More Accessible
Cyclins	CCNA1	Tumor More Accessible	Tumor More Accessible	Tumor More Accessible	Normal More Accessible	Tumor More Accessible	Normal More Accessible
	CCNA2	Tumor More Accessible	Tumor More Accessible	Tumor More Accessible	No Accessibility Difference	Tumor More Accessible	Normal More Accessible
	CCNB1	Tumor More Accessible	Tumor More Accessible	Tumor More Accessible	Tumor More Accessible	Tumor More Accessible	Normal More Accessible
	CCNB2	Tumor More Accessible	Tumor More Accessible	Tumor More Accessible	Normal More Accessible	Tumor More Accessible	Normal More Accessible
	CCNB3	Tumor More Accessible	Tumor More Accessible	Tumor More Accessible	Tumor More Accessible	Tumor More Accessible	No Accessibility Difference
	CCNC	Tumor More Accessible	Tumor More Accessible	Tumor More Accessible	Tumor More Accessible	Tumor More Accessible	Normal More Accessible
	CCND1	Tumor More Accessible	Tumor More Accessible	Tumor More Accessible	Tumor More Accessible	No Accessibility Difference	Normal More Accessible
	CCND2	Tumor More Accessible	Tumor More Accessible	Tumor More Accessible	Normal More Accessible	Tumor More Accessible	Normal More Accessible
	CCND3	Tumor More Accessible	Tumor More Accessible	Tumor More Accessible	Normal More Accessible	Tumor More Accessible	Tumor More Accessible
	CCNE1	Tumor More Accessible	Tumor More Accessible	Tumor More Accessible	Tumor More Accessible	Tumor More Accessible	Normal More Accessible
	CCNE2	Tumor More Accessible	Tumor More Accessible	Tumor More Accessible	Tumor More Accessible	Tumor More Accessible	Normal More Accessible
	CCNF	Tumor More Accessible	Tumor More Accessible	Tumor More Accessible	No Accessibility Difference	Tumor More Accessible	Normal More Accessible
	CCNG1	Tumor More Accessible	Tumor More Accessible	Tumor More Accessible	Tumor More Accessible	Tumor More Accessible	Normal More Accessible
	CCNG2	Tumor More Accessible	Tumor More Accessible	Tumor More Accessible	No Accessibility Difference	Tumor More Accessible	Normal More Accessible
	CCNH	Tumor More Accessible	Tumor More Accessible	Tumor More Accessible	No Accessibility Difference	Tumor More Accessible	Normal More Accessible
	CCNI	Tumor More Accessible	Tumor More Accessible	Tumor More Accessible	No Accessibility Difference	Tumor More Accessible	Normal More Accessible
	CCNI2	Tumor More Accessible	Normal More Accessible	Tumor More Accessible	No Accessibility Difference	Tumor More Accessible	Normal More Accessible
	CCNJ	Tumor More Accessible	Tumor More Accessible	Tumor More Accessible	Tumor More Accessible	Tumor More Accessible	No Accessibility Difference
	CCNJL	Tumor More Accessible	No Accessibility Difference	Tumor More Accessible	Normal More Accessible	Tumor More Accessible	No Accessibility Difference
	CCNK	Tumor More Accessible	Tumor More Accessible	Tumor More Accessible	No Accessibility Difference	Tumor More Accessible	Normal More Accessible
	CCNL1	Tumor More Accessible	Tumor More Accessible	Tumor More Accessible	No Accessibility Difference	Tumor More Accessible	Normal More Accessible
	CCNL2	Tumor More Accessible	Tumor More Accessible	Tumor More Accessible	No Accessibility Difference	Tumor More Accessible	Normal More Accessible
	CCNO	Tumor More Accessible	Tumor More Accessible	Tumor More Accessible	Tumor More Accessible	Tumor More Accessible	Normal More Accessible
	CCNQ	Tumor More Accessible	Tumor More Accessible	No Accessibility Difference	Tumor More Accessible	Tumor More Accessible	Normal More Accessible
	CCNT1	Tumor More Accessible	Tumor More Accessible	Tumor More Accessible	Normal More Accessible	Tumor More Accessible	Normal More Accessible
	CCNT2	Tumor More Accessible	Tumor More Accessible	Tumor More Accessible	No Accessibility Difference	Tumor More Accessible	Normal More Accessible
Anti-Apoptotic	MCL1	Tumor More Accessible	Tumor More Accessible	Tumor More Accessible	Tumor More Accessible	Tumor More Accessible	Normal More Accessible
	BCL2	Tumor More Accessible	Tumor More Accessible	Tumor More Accessible	Tumor More Accessible	Tumor More Accessible	Normal More Accessible
	BCL2L1	Tumor More Accessible	Tumor More Accessible	Tumor More Accessible	Tumor More Accessible	Tumor More Accessible	Normal More Accessible
	XIAP	Tumor More Accessible	Tumor More Accessible	Tumor More Accessible	Tumor More Accessible	Tumor More Accessible	Normal More Accessible
MMR	MLH1	Tumor More Accessible	Tumor More Accessible	Tumor More Accessible	Normal More Accessible	Tumor More Accessible	Normal More Accessible
	MLH3	Tumor More Accessible	Tumor More Accessible	Tumor More Accessible	Tumor More Accessible	Tumor More Accessible	Normal More Accessible
	MSH2	Tumor More Accessible	Tumor More Accessible	Tumor More Accessible	Tumor More Accessible	Tumor More Accessible	No Accessibility Difference
	MSH3	Tumor More Accessible	Tumor More Accessible	Tumor More Accessible	Tumor More Accessible	Tumor More Accessible	Normal More Accessible
	MSH4	Tumor More Accessible	Tumor More Accessible	Tumor More Accessible	Normal More Accessible	Tumor More Accessible	Normal More Accessible
	PMS1	Tumor More Accessible	Tumor More Accessible	Tumor More Accessible	No Accessibility Difference	Tumor More Accessible	Normal More Accessible
	PMS2	Tumor More Accessible	Tumor More Accessible	Tumor More Accessible	No Accessibility Difference	Tumor More Accessible	Normal More Accessible
	EXO1	Tumor More Accessible	Tumor More Accessible	Tumor More Accessible	Tumor More Accessible	Tumor More Accessible	Normal More Accessible
